# Supplementary material for: Chromosome-level genome assembly of Mentha longifolia L. reveals gene organization underlying disease resistance and essential oil traits
Source: PubMed Central journal article supplement (PMC9339296; doi:10.1093/g3journal/jkac112), 2022-05-12

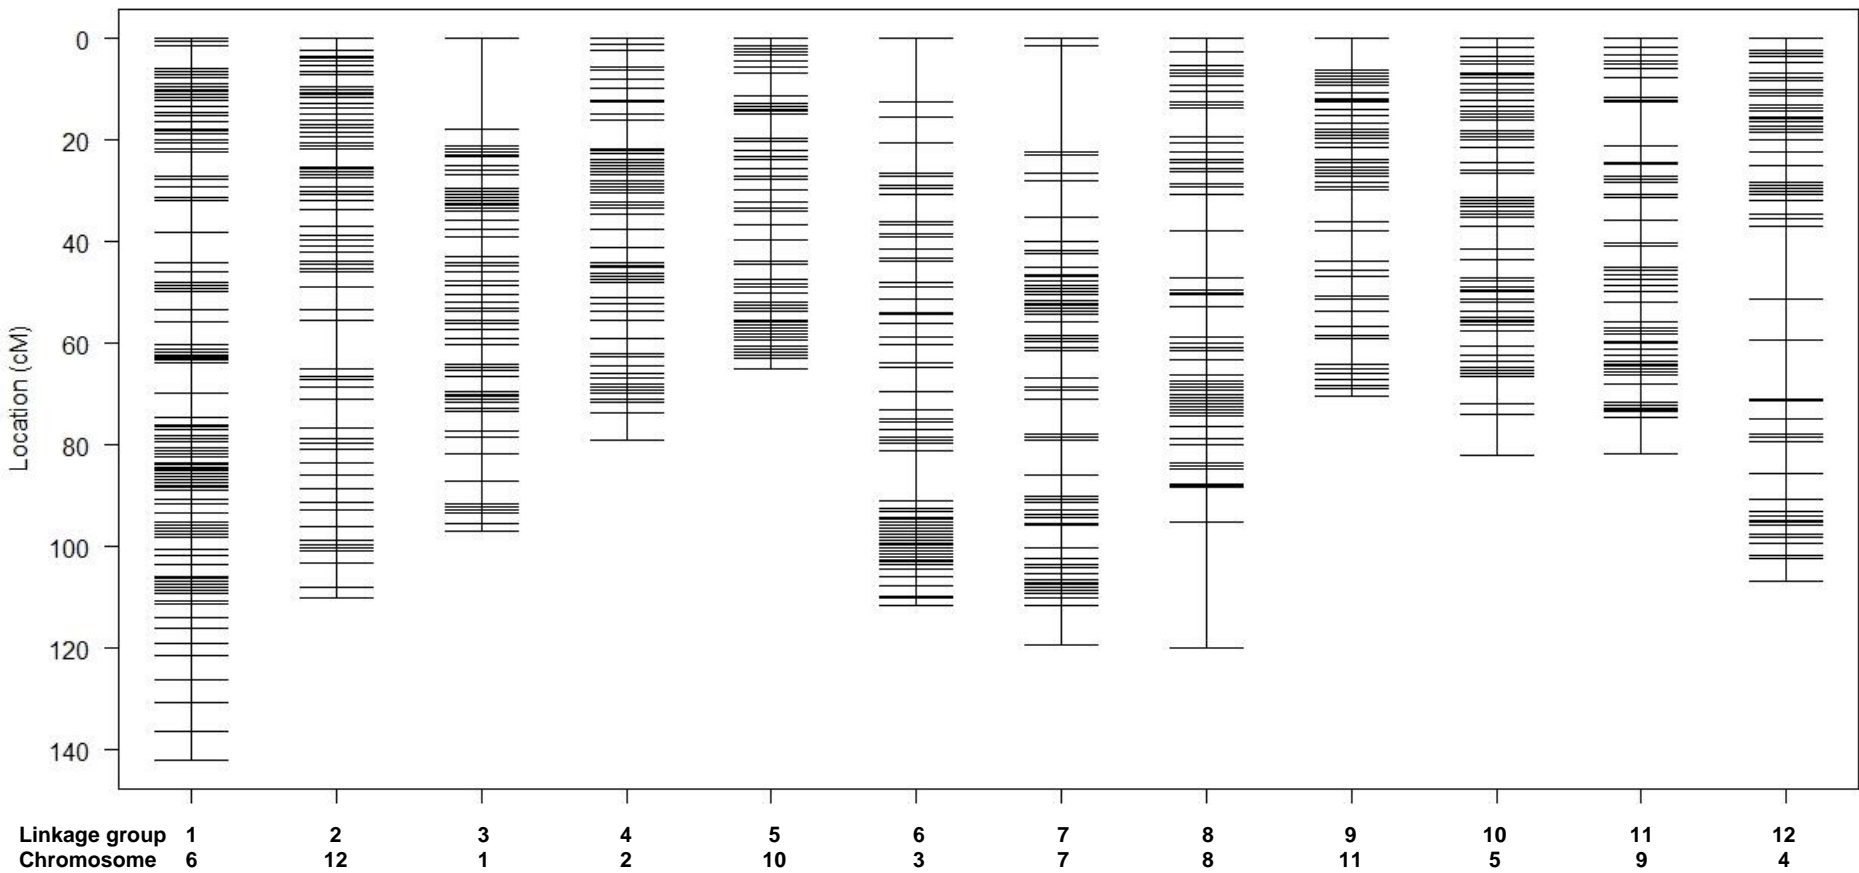

Supplement: jkac112_figure_s2.pdf [file jkac112_figure_s2.pdf]
