# Supplementary material for: Chromosome-level genome assembly of Mentha longifolia L. reveals gene organization underlying disease resistance and essential oil traits
Source: PubMed Central journal article supplement (PMC9339296; doi:10.1093/g3journal/jkac112), 2022-05-12
Supplement: jkac112_figure_s4.pdf [file jkac112_figure_s4.pdf]

A.

```

      10      20      30      40      50      60      70
Mlong585_04031 MRIRGLPWFLFISLIQLFLAGVYTQCCLDDQRFILLQLKSLALAFDLTSSSTKL-----WNGVDCD
Mlong585_04055 ..QLFSRL.....I.VL.SS..E...SS.....NT.E.NSN..S..VKWNQSDCCR.E....

      80      90      100     110     120     130     140
Mlong585_04031 GAGHVISLNLESETISGGLENSSTLFRLLQYLEELNLAFNPFNSDQIPKGFQNLTSLSYLNLSNAGFAEQV
Mlong585_04055 .E.R..G...N..T..N..P..E...KR.....GA....I...N.AH.....GG..

      150     160     170     180     190     200     210
Mlong585_04031 PIEVSMSSLLVLDLSTLFGGAQPLKLEKPNLQQLAQNLTLGLRELYLDNVNISSQSEWGPALSSSLPNL
Mlong585_04055 .V.I.RL...LI.....P...R..N...R.V...PR.....Y.....CQ.....

      220     230     240     250     260     270     280
Mlong585_04031 TTLSLRS CGLSGPLDSSLAGFHSLSVLRLLDDNLSATVPEFMSGFNSLTAALNLGNCFLOGTFPDKIPQLH
Mlong585_04055 ..L...L...GDLR...I...R...TMI.V..AD...T.T..S...L.....VK

      290     300     310     320     330     340     350
Mlong585_04031 TLQVLDLNNKLNGLAIPFFVSSLRMTMILSYTNFSGWLPNSIGNLRMLSKIDFSNCFNFTGSI PASVSN
Mlong585_04055 ..N.E...EQ..T...L.....V.....S..H.....R..L.....I..

      360     370     380     390     400     410     420
Mlong585_04031 LTELVHLDFSLNDFMGSIPFMSKKLAYLDLSRNSITGSLSSKHFEGLSNLWYINLGVNSLNGTIPPSL
Mlong585_04055 .....S.....H.....V.....L.....Q.....

      430     440     450     460     470     480     490
Mlong585_04031 FDLPSLQRLHLFNNKFSGQITEFPIPNPSSLDVTDLNLRLEGSIPESFFKLEGLSILSLSNLFGNSLK
Mlong585_04055 .G....S.Q.S..R....G.....T..L..S...D.....NV.....H.T..

      500     510     520     530     540     550     560
Mlong585_04031 LEKVQRFNLRLELGYNRLSVDTSNMSSFQYPQLSRNLNASCNLLDFPNLRNQSRLFLDLSHNSIKGE
Mlong585_04055 .....S.....K.....

      570     580     590     600     610     620     630
Mlong585_04031 LPSWLNIGNGSLNHLNVSRYLVDLQKPTIPLFLGVLDLNTNSLKGEFPLPPSATYVDYSNNSFQQG
Mlong585_04055 .....L.....

      640     650     660     670     680     690     700
Mlong585_04031 IPVNVANNSLTGTIPESLGDATYLQVLDLSDNNSLGTIPDCLVKGFTLAVLNLRNNIEGNI PDVPSSTC
Mlong585_04055 .....

      710     720     730     740     750     760     770
Mlong585_04031 GLKTL DLSQNNIGGKIPLSMANCTSLVNLNIGNNKIEDEFPCRKSSSLRVLVLRSNKLYGDISCTEIN
Mlong585_04055 .....I..V.....V.....F..N.....

      780     790     800     810     820     830     840
Mlong585_04031 GSWPNLQIIDIAFNPSFGGEINPRCIASWKGMMLNGTQLRGEHIRFEFLTKFYQDAVIVTKGLELELV
Mlong585_04055 .T.....K.....T.....D.....K-----LM.....

      850     860     870     880     890     900     910
Mlong585_04031 KLLTFTAI DLSGNFSGNI PQTIGDLSLYVLNLSHNAFSGAIPSSIGNLKQLGSLDLSVNQLTGMVPO
Mlong585_04055 ...V....F...K.....P.V.....I.....S.....R.....

      920     930     940     950     960     970     980
Mlong585_04031 ELTSLNFLSFLNLSYNMLVGKIPDGNQLQTF SALS YTGNLGLCGFP--LMNTICYHNSFVGNSP-----
Mlong585_04055 .....I..V.YPAK.TKRW.S.DFNWQF.FTGLGFGVGA

      990     1000    1010    1020
Mlong585_04031 -----ASLNKRKYDWOQLIIT-----
Mlong585_04055 SLILAPLAPCKEWEKCEQTDQFMKM.YPKYGFSVVRHDSK

```

B.

Mlong585\_04055  
 Ve1 [AAK58682.1] .....10.....20.....30.....40.....50.....60.....70  
 ---MRIQLFSLRLLFIS-LIQILI--LVLVSSQCLEDQRSSLLQLKNTLEPNSNSSSKLVKWN-QSDECC  
 MKM.ATLY.PMV.L.P.SF....SGYHIF.....D.K.L...F.GS.QYD.TL.K.A...DMTS...

Mlong585\_04055  
 Ve1 [AAK58682.1] .....80.....90.....100.....110.....120.....130.....140  
 RWEGVDCDGGEGRVIGLNLENETTIGGINNSSPLFELQYLRKLNLAFAFNGAQIPKGIQNLNTLAHLNLS  
 N.N..T.NLF.H..A.E.DD..SS..E..A..S...ES...D.M.VG-.V.D...KY....

Mlong585\_04055  
 Ve1 [AAK58682.1] .....150.....160.....170.....180.....190.....200.....210  
 NAGFGGVVPEISRLSSLLLDLSTLPGG-PQPLRLLENPNLQRLVQNLPRRLRELYLYVNISSQRSEWQ  
 ...V..I..ITL...TR.VT....ILPFFD...K....SHPIE.STE.....G.DL.A.T...S..

Mlong585\_04055  
 Ve1 [AAK58682.1] .....220.....230.....240.....250.....260.....270.....280  
 ALSSSLPNLTTLSLRSCGLSPLDSSLGLDRLSLILRLDRNNLSTMI PVFMAFNSLTTLTGSCPLLTG  
 S..LH.....V...D.Q.I...E..SK.HF..FVQ...Q...STV.EYF.N.....N.Q...

Mlong585\_04055  
 Ve1 [AAK58682.1] .....290.....300.....310.....320.....330.....340.....350  
 FPKIFQVKTQLNLELSNNEQLNGTIPELPVSSSLRTMVLVSYNFPSSGLPHSIGNLRMLSRIDLNSCNPT  
 ..ER...SV.E.S.D..I..KL.R.S..IPFRNG...RIS.....E..S.HQN...LB.....Y

Mlong585\_04055  
 Ve1 [AAK58682.1] .....360.....370.....380.....390.....400.....410.....420  
 GSTPASISNLTLEVHLDPSLNSFMGSIHPFMSMKLVLDLDSNSLTSQHFEGLSNMLVYINLGVNS  
 ...STMA..RN.GY...F.N.T...PY.RL...T.....G...L..RA...E..H...N.L

Mlong585\_04055  
 Ve1 [AAK58682.1] .....430.....440.....450.....460.....470.....480.....490  
 LINGTIPPSLFGPLSQSLQSNRRFSGQIGFPIPNPSTLDTLDLSSNRLDGSIPESFFKLEGLNVLSSLS  
 .S.SL.AYI.E...Q.F.YR.Q.V..VD..RNASS.P...V..TN.H.N...K.M.BE.R.K....

Mlong585\_04055  
 Ve1 [AAK58682.1] .....500.....510.....520.....530.....540.....550.....560  
 SNLFGHTLKLKLVQVQSPFNLTRELELYNKLSDVTS--NMSFQYQQLSRNLASCNLLDFPNLRNQSRLLF  
 .F.R..VP..DLIGRLS..S...S.N.T..A.SS.ST..TF..NI.K...R.QK..D.K...MMH...

Mlong585\_04055  
 Ve1 [AAK58682.1] .....570.....580.....590.....600.....610.....620.....630  
 LDLSHNSIKGELPSWIWNIQNSLNHLNLSRNYLVDLQKPTIIPPLGVLDLNTNSLKGFFLPPPSAIY  
 ...D.Q.L.AI.N...G..G.G.A...F.Q.EYVEQ.Y.ASSN.V...HS.R...DLLL..CT...

Mlong585\_04055  
 Ve1 [AAK58682.1] .....640.....650.....660.....670.....680.....690.....700  
 VDYSNNSFQQAIP-----VNVANNSLTGTIPESLDCDATYLQVLDLSDNNLSGTIPDCLVKG-F  
 .S.NLNN.S.TDIGKSLGFASFFS...GI..I...I.NCS.....F.N.A...P..LEYST

Mlong585\_04055  
 Ve1 [AAK58682.1] .....710.....720.....730.....740.....750.....760.....770  
 TLAVLNLRNNIEGNIPDVFSSTCGLKTLDLSQNNIGGKIPLSMANCTSLLEILNVGNKIEDVPPCRKLS  
 K.G...GN.KLN.V...S..IG.A.Q...A..LQ.RL.K.IV..KL..V...RIV.H...M.RN

Mlong585\_04055  
 Ve1 [AAK58682.1] .....780.....790.....800.....810.....820.....830.....840  
 SSSLRVLVRNSKPYGNISCTEINGTWPNLQIIDIAFNSFGKINPRCIATWKGMMNGTQLRG-DHIR  
 .N.....N...LT.NITKHS.K...S.N.T.ML.AE.FTN.R...VAKDYVET.RN..QY..

Mlong585\_04055  
 Ve1 [AAK58682.1] .....850.....860.....870.....880.....890.....900.....910  
 FEFKLK-----MTVTIKGLELELVKILTVFTAI DFS CNKFPNGIPPTVGLDSSLYILNLSHNSFSGA  
 Y..Q.SKLYYQDVT.L...M.....R...S...S.R.Q.K.A..DAI..N...V.....ALE.P..K

Mlong585\_04055  
 Ve1 [AAK58682.1] .....920.....930.....940.....950.....960.....970.....980  
 IPRSIGNLKQLGSLDLSVNLQTMVQPBELTSLNPLSLFNLSNMLVKGIPDGNLQTPSALS YIGN--V  
 ..K..K.QM.E...T.H.S.EI.S..A..T..AA...F.K.F...ST..F...D.FE..SGLC

Mlong585\_04055  
 Ve1 [AAK58682.1] .....990.....1000.....1010.....1020.....1030.....1040.....1050  
 GYPAKPKTKRWN-----SIDFNWQVFTGLGFGVGASLLIAPLAFCKEWRKEDQTDQPMK  
 .L.LNNSCQS.GSASESLPPTPLDPS..DE.E.I.AAV.YI...ANIVSVWV.Y.PVKWKF.KHMEKCLL

Mlong585\_04055  
 Ve1 [AAK58682.1] .....1060  
 MIYPKYGSYVRHDSK  
 WFSR-----

Mlong585\_04055  
 Ve2 [AAK58012.1] .....10.....20.....30.....40.....50.....60.....70  
 MRIQLFSLRLLFIS-LIQILI--LVLVSSQCLEDQRSSLLQLKNTLEPNSNSSSKLVKWN-QSDECC  
 .FLH.LWIF..IPFL..LGNEIL.....D.K.L...GSPQYD.TL.N..AR..HNS...N.N

Mlong585\_04055  
 Ve2 [AAK58012.1] .....80.....90.....100.....110.....120.....130.....140  
 GVDCDGGEGRVIGLNLENETTIGGINNSSPLFELQYLRKLNLAFAFNGAQIPKGIQNLNTLAHLNLSNAG  
 .T..L.S.H..A.E.DD.K.SS..E.A.A..S...E...Y.K.VG-.V..G...TY.....

Mlong585\_04055  
 Ve2 [AAK58012.1] .....150.....160.....170.....180.....190.....200.....210  
 FGGQVPEISRLSSLLLDLSTLPGG-PQPLRLLENPNLQRLVQNLPRRLRELYLYVNISSQRSEWQALS  
 .V..I..MML...TR.VT....PDFA..K....SHPIE.STE.....G.DL.A.T...S..

Mlong585\_04055  
 Ve2 [AAK58012.1] .....220.....230.....240.....250.....260.....270.....280  
 SSLPNLTTLSLRSCGLSPLDSSLGLDRLSLILRLDRNNLSTMI PVFMAFNSLTTLTGSCPLLTGTPD  
 .Y.....V...T.RI...I.E..SK.HF..FI..Q...TV.EYF.N.....S.N.Q...K

Mlong585\_04055  
 Ve2 [AAK58012.1] .....290.....300.....310.....320.....330.....340.....350  
 KIFQVKTQLNLELSNNEQLNGTIPELPVSSSLRTMVLVSYNFPSSGLPHSIGNLRMLSRIDLNSCNPTGS  
 R...PV.EF.D..T.KL.S.S..IP.QIG...IS...YK...DT.S..QN...LE.....SEP

Mlong585\_04055  
 Ve2 [AAK58012.1] .....360.....370.....380.....390.....400.....410.....420  
 PASISNLTLEVHLDPSLNSFMGSIHPFMSMKLVLDLDSNSLTSQHFEGLSNMLVYINLGVNSLNG  
 .STMA...N.Y...F.N.T..LPY.QGA...I...G...L..RA...E..H...N.N

Mlong585\_04055  
 Ve2 [AAK58012.1] .....430.....440.....450.....460.....470.....480.....490  
 TTPPSLFGPLSQSLQSNRRFSGQIGFPIPNPSTLDTLDLSSNRLDGSIPESFFKLEGLNVLSSLSNLS  
 SL.AYI.E...KQ.F.YS.Q.V..VD..RNASS.P...V..RN.H.N...K.M.EVGR.K.....F

Mlong585\_04055  
 Ve2 [AAK58012.1] .....500.....510.....520.....530.....540.....550.....560  
 FHGHTLKLKLVQVQSPFNLTRELELYNKLSDVTS--NMSFQYQQLSRNLASCNLLDFPNLRNQSRLFLDL  
 .R..VP..DLIGRLS..S...S.N.T..A.SS.ST..TF..NI.K...R.QK..D.K...MMH...

Mlong585\_04055  
 Ve2 [AAK58012.1] .....570.....580.....590.....600.....610.....620.....630  
 SHNSIKGELPSWIWNIQNSLNHLNLSRNYLVDLQKPTIIPPLGVLDLNTNSLKGFFLPPPSAIYVDY  
 .D.Q.L.AI.N...G..G.G.A...F.Q.EYVEQ.Y.VSSN.V...HS.R...DLLL..ST.....

Mlong585\_04055  
 Ve2 [AAK58012.1] .....640.....650.....660.....670.....680.....690.....700  
 SNNSFQQAIP-----VNVANNSLTGTIPESLDCDATYLQVLDLSDNNLSGTIPDCLVKG-FTLA  
 .S.NLNN.S.TDIGRSLGFASFFS...I..I...I.NVS.....F.N.A...P..LEYSK.G

Mlong585\_04055  
 Ve2 [AAK58012.1] .....710.....720.....730.....740.....750.....760.....770  
 VLNLRNNIEGNIPDVFSSTCGLKTLDLSQNNIGGKIPLSMANCTSLLEILNVGNKIEDVPPCRKLS  
 .GN.RLH.V...S.PIG.A.I...R.IFE..L.K.LV..L.V...SLV.R...M.RN.T

Mlong585\_04055  
 Ve2 [AAK58012.1] .....780.....790.....800.....810.....820.....830.....840  
 LRVLVRNSKPYGNISCTEINGTWPNLQIIDIAFNSFGKINPRCIATWKGMMNGTQLRG-DHIRPEF  
 .K...N...LT.NITKHS.K...S.N.T.ML.AE.FTN.R...VAKDYVET.RN..QY..

Mlong585\_04055  
 Ve2 [AAK58012.1] .....850.....860.....870.....880.....890.....900.....910  
 LKLK-----MTVTIKGLELELVKILTVFTAI DFS CNKFPNGIPPTVGLDSSLYILNLSHNSFSGAIP  
 .Q.SNLYYQDVT.LI...M.....R...S...S.R.Q.K..D.....V.....ALE.P..K

Mlong585\_04055  
 Ve2 [AAK58012.1] .....920.....930.....940.....950.....960.....970.....980  
 SIGNLKQLGSLDLSVNLQTMVQPBELTSLNPLSLFNLSNMLVKGIPDGNLQTPSALS YIGN--VYGP  
 ..K.QM.E...R.H.S.EI.S..S..T..AV...F.N.F...QS..FE...E.FE..RGLC.L

Mlong585\_04055  
 Ve2 [AAK58012.1] .....990.....1000.....1010.....1020.....1030.....1040.....1050  
 AK-----PTKRWNISIDFNWQVFTGLGFGVGASLLIAPLAFCKEWRKEDQTDQPMKMIYPK  
 LN-VICKSDTSELK.APSSQDSDYD...I...V.Y...AISL...L.Y.QGNKYF.KHLERML.LMP.R

Mlong585\_04055  
 Ve2 [AAK58012.1] .....1060.....1070.....1080.....1090.....1100.....1110.....1120  
 YGFSYVRHDSK-----  
 .W...T.F.PGKVAVEHYEDET.PDDTEDDDEGGKEASLGRYVCFCSKLD.PQNEAMHD.PKCTCHMSSE

Mlong585\_04055  
 Ve2 [AAK58012.1] .....1130.....1140  
 NSFPPTPSFFPLLVYHKF

C.

Mlong585\_04031  
 Ve1 [AAK58682.1]
   
 10 20 30 40 50 60 70
   
 ---MRIRGLPWFLFIS-LIQILF--LAGVYTQCLDDQRFILQLKLSALAFDLTSSTKL-----
   
 MKM.ATLYF.MV.L.P-SF---SGYHIFL.SS.....KSL...F.GS.QY.S.L.K..AKWNDMTSECC
   
 80 90 100 110 120 130 140
   
 Mlong585\_04031
   
 Ve1 [AAK58682.1]
   
 -WNGVDCDAGHVISLNLESETISGGIENSTLFRQLYLEELNLAFFNFNSDQI PKGFQNLTSLSYINLS
   
 N...T.NLF...A.E.DD...S...A...S...S...D.M.VG--V.ID...N.K...
   
 150 160 170 180 190 200 210
   
 Mlong585\_04031
   
 Ve1 [AAK58682.1]
   
 NAGFAEQVPIEVSMMSLIVLDLSTLFGG-AQPLKLEKPNLQQAQNLTGRELYLDNVI NSQRSEWGP
   
 .VG.I..TL.RLTR.VT....ILPFFD.....N...SHFIE.S.E.....G.DL...T.CQ
   
 220 230 240 250 260 270 280
   
 Mlong585\_04031
   
 Ve1 [AAK58682.1]
   
 ALSSELNLTLSLRSCGLSGPLDSSLAGPHSLVLRLLDDNLSATVPEFMSGFNLTALNLCNCFLQGT
   
 S...LH...V...D.QI...E...SKL.F...FVQ..Q...S...YFAN...T.T.S.S.N...
   
 290 300 310 320 330 340 350
   
 Mlong585\_04031
   
 Ve1 [AAK58682.1]
   
 FPKIFQLHTLQVLDSLNNKLNLAIPFPVSSSLRMTLSYTNPSGWLFPNSIGNRMLSKIDFPNGFT
   
 .ER...VSV.ES...I..L.R.S..I.FRNG...RIS...S.E..S.HQN.RLEL...Y
   
 360 370 380 390 400 410 420
   
 Mlong585\_04031
   
 Ve1 [AAK58682.1]
   
 GSIPASVSNLTELVLHDFSLNDFMGSIPPFMSMKLAYLDLRSNITGSLSSKHPEGLSNLVYINLGVNS
   
 .STMA..RN.GY...F.N.T...Y.RL...T...GL..L..RA...E..H...N.L
   
 430 440 450 460 470 480 490
   
 Mlong585\_04031
   
 Ve1 [AAK58682.1]
   
 LNSTIPPSPFLDPLSQRLHLFNKFSGQITFPPIPNPSSLDTVDLSNNRLRSGSIPESFPKLEGLSILSLS
   
 .S.L.AYI.E...Q.F.YR.Q.V..VD..RNASS.P...T..H.N...K.M.EI.R.KV...
   
 500 510 520 530 540 550 560
   
 Mlong585\_04031
   
 Ve1 [AAK58682.1]
   
 SNLFVNSLKLEKQVRFNPLTRLELGYNRLSVDTS--NMSFQYPLSRNLNASCNLLDFPNLRNQSRLFLD
   
 .F.R.TVP.DLIG.LS..S...S.N.T..A.SS.ST..TF..NI.K...R.QK..D.K...MMH
   
 570 580 590 600 610 620 630
   
 Mlong585\_04031
   
 Ve1 [AAK58682.1]
   
 LLLSHNSIKGELPSWIWNI GNSLNHLNVSRNLYLVDLQKPFITPPLGVLDLNTNSLKGEPFLPSPSATY
   
 .D.Q.L.AI.N...G..G.G.A...L.F.Q.EYVEQ.Y.ASSN.V...HS.R...DLLI..CT.I...
   
 640 650 660 670 680 690 700
   
 Mlong585\_04031
   
 Ve1 [AAK58682.1]
   
 VVYSNNSFQGIIP-----VNVANNSLTGTIPESLCDATYLVLDLSDNNSLGTIPDCLVKG-F
   
 .S.NLNN.S.TDIGKSLGFASFSS...GI..I..NCS...F.N.A...P..LEYST
   
 710 720 730 740 750 760 770
   
 Mlong585\_04031
   
 Ve1 [AAK58682.1]
   
 TLAVLNLRNNIEGNI PDVFSSTCGLKTLDLSQNNIGGKIPLSMANCTSLSEVLNIGNNKIEDEFPCKLKS
   
 K.G...GN.KLN.V...S..IG.A.Q...A..LQ.RL.K.IV..KL...V...RLV.H...M.RN
   
 780 790 800 810 820 830 840
   
 Mlong585\_04031
   
 Ve1 [AAK58682.1]
   
 SSSLVLRVLSRNKLYGDISCTEINGSWPNLQIIDIAFNSPGGEINPRCTASWKGMMGLGNTQLRG-EHR
   
 .N...N...F..NLM.DVTRN..Q...S.N.T.VL.AEFPN.R...VADDYVET.RN..Q
   
 850 860 870 880 890 900 910
   
 Mlong585\_04031
   
 Ve1 [AAK58682.1]
   
 FEPFLTK--FYQDAVVTIIRKLELVLKILTLFTAIDLS CNFNSGNTPQTTIGDLSLVNLNSHNAFSGA
   
 Y...QLSKL...T.L...M...RV..S..F.S.R.Q.A.DA..N...L...E.P
   
 920 930 940 950 960 970 980
   
 Mlong585\_04031
   
 Ve1 [AAK58682.1]
   
 IPSSIGNLKQLGSLDLSVNLQTMVPOELTSLNPLSFLNLSNMMLVVKPIGQQLTQFSALSITGNLGLGC
   
 .K.K.QM.E...T.H.S.EI.S..A..T..AA...F.K.F...ST.F...D.FE..S...
   
 990 1000 1010 1020 1030 1040 1050
   
 Mlong585\_04031
   
 Ve1 [AAK58682.1]
   
 GFLMNTIYCHNSPVGNSP--ASLNKRVDVQQLIIT
   
 .L.N.SQSQNG.ASESL.PPTP.PDSDBE.EF.PAAGYIVGAANTISVWVYKPVKVKWFDKHMEKCLL
   
 1060 1070 1080 1090 1100 1110 1120
   
 Mlong585\_04031
   
 Ve1 [AAK58682.1]
   
 WFSRK
   
 1130 1140
   
 Mlong585\_04031
   
 Ve1 [AAK58682.1]
   
 WFSRK

Mlong585\_04031  
 Ve2 [AAK58012.1]
   
 10 20 30 40 50 60 70
   
 MRIRGLPWFLFIS-LIQILF--LAGVYTQCLDDQRFILQLKLSALAFDLTSSTKL-----WN
   
 .FLHFL.IF..IPFL..LGNBELL.SS.....KSL...GSFYQ.S.L.N..ARWNHTSECCN..
   
 80 90 100 110 120 130 140
   
 Mlong585\_04031
   
 Ve2 [AAK58012.1]
   
 GVDCDAGHVISLNLESETISGGIENSTLFRQLYLEELNLAFFNFNSDQI PKGFQNLTSLSYINLSNAG
   
 .T..LS...A.E.DD.K..S...A.A...S...R...Y.K..VG--V.IG...N.T...
   
 150 160 170 180 190 200 210
   
 Mlong585\_04031
   
 Ve2 [AAK58012.1]
   
 FAQVPIEVSMMSLIVLDLSTLFGG-AQPLKLEKPNLQQAQNLTGRELYLDNVI NSQRSEWGPALS
   
 .VG.I..MML.RLTR.VT....PDF.....N...SHFIE.S.E.....G.DL.A..T..CQS..
   
 220 230 240 250 260 270 280
   
 Mlong585\_04031
   
 Ve2 [AAK58012.1]
   
 SSELNLTLSLRSCGLSGPLDSSLAGPHSLVLRLLDDNLSATVPEFMSGFNLTALNLCNCFLQGTFFD
   
 .Y...V...T.RI...I.E.SKL.F...FI..Q...T...YFAN...T.T.S.S.N...K
   
 290 300 310 320 330 340 350
   
 Mlong585\_04031
   
 Ve2 [AAK58012.1]
   
 KIFQLHTLQVLDSLNNKLNLAIPFPVSSSLRMTLSYTNPSGWLFPNSIGNRMLSKIDFPNGFTGSI
   
 R...VVPV.EP...T.L.S.S..I..QIG...IS...K..S..T.S..QN.RLEL...SEP.
   
 360 370 380 390 400 410 420
   
 Mlong585\_04031
   
 Ve2 [AAK58012.1]
   
 PASVSNLTELVLHDFSLNDFMGSIPPFMSMKLAYLDLRSNITGSLSSKHPEGLSNLVYINLGVNSLNG
   
 .STMA...N..Y...F.N.T...L.Y.QGA..I...T...GL..L..RA...E..H...N...
   
 430 440 450 460 470 480 490
   
 Mlong585\_04031
   
 Ve2 [AAK58012.1]
   
 TIPPSPFLDPLSQRLHLFNKFSGQITFPPIPNPSSLDTVDLSNNRLRSGSIPESFPKLEGLSILSLS
   
 SL.AYI.E...KQ.F.YS.Q.V..VD..RNASS.P...R..H.N...K.M.EVGR.KV...F
   
 500 510 520 530 540 550 560
   
 Mlong585\_04031
   
 Ve2 [AAK58012.1]
   
 FNSLKFVNSLKLEKQVRFNPLTRLELGYNRLSVDTS--NMSFQYPLSRNLNASCNLLDFPNLRNQSRLFLD
   
 .R.TVP.DLIG.LS..S...S.N.T..A.SS.ST..TF..NI.K...R.QK..D.K...MMH
   
 570 580 590 600 610 620 630
   
 Mlong585\_04031
   
 Ve2 [AAK58012.1]
   
 SHNSIKGELPSWIWNI GNSLNHLNVSRNLYLVDLQKPFITPPLGVLDLNTNSLKGEPFLPSPSATVVDY
   
 .D.Q.L.AI.N...G..G.G.A...L.F.Q.EYVEQ.Y.VSSN.V...HS.R...DLLI..ST.I...
   
 640 650 660 670 680 690 700
   
 Mlong585\_04031
   
 Ve2 [AAK58012.1]
   
 SNNNSFQGIIP-----VNVANNSLTGTIPESLCDATYLVLDLSDNNSLGTIPDCLVKG-FTLA
   
 .S.NLNN.S.TDIGRSLGFASFSS...I..I..NVS...F.N.A...P..LEYSK.G
   
 710 720 730 740 750 760 770
   
 Mlong585\_04031
   
 Ve2 [AAK58012.1]
   
 VLNLRNNIEGNI PDVFSSTCGLKTLDLSQNNIGGKIPLSMANCTSLSEVLNIGNNKIEDEFPCKLKS
   
 .GN.RLH.V...S.PIG.A.I...R.IFE..L.K.IV...L...V...SLV.R...M.RN.T.
   
 780 790 800 810 820 830 840
   
 Mlong585\_04031
   
 Ve2 [AAK58012.1]
   
 LRVLVLRNKLKLYGDISCTEINGSWPNLQIIDIAFNSPGGEINPRCTASWKGMMGLGNTQLRG-EHRIFEF
   
 .K...N...FN.NLT.NITKH..K...S.N.T.ML.AE.FTN.R..VAKDYVET.RN..QY..
   
 850 860 870 880 890 900 910
   
 Mlong585\_04031
   
 Ve2 [AAK58012.1]
   
 LTK--FYQDAVVTIIRKLELVLKILTLFTAIDLS CNFNSGNIPQTTIGDLSLVNLNSHNAFSGAIP
   
 .QLSNL...T.L...M...RV..S..F.S.R.Q.K..D.V...L...E.P.K
   
 920 930 940 950 960 970 980
   
 Mlong585\_04031
   
 Ve2 [AAK58012.1]
   
 SIGNLKQLGSLDLSVNLQTMVPOELTSLNPLSFLNLSNMMLVVKPIGQQLTQFSALSITGNLGLGC
   
 .K.QM.E...R.H.S.EI.S..S...T..AV...F.N.F...QS..FE..E.FE..R...L..
   
 990 1000 1010 1020 1030 1040 1050
   
 Mlong585\_04031
   
 Ve2 [AAK58012.1]
   
 LMNTIYCHNSPVGNSPASNKRVDVQQLIIT
   
 .N-V..KSDTSELKPA.P.SQDSS...F.F.GVYGVGAASIAPIPLPYKQNKYFDKHLEMLKMPFR
   
 1060 1070 1080 1090 1100 1110 1120
   
 Mlong585\_04031
   
 Ve2 [AAK58012.1]
   
 WYFSYTRFDPGKVVAVEHVEDET PDDTDDDEGGKEASLGRYCVSCKLDFOKNEAMHDPKCTCHMSSP
   
 1130 1140
   
 Mlong585\_04031
   
 Ve2 [AAK58012.1]
   
 NSFPPTPFFSPLLYIYHKF
