# Supplementary material for: Chromosome-level genome assembly of Mentha longifolia L. reveals gene organization underlying disease resistance and essential oil traits
Source: PubMed Central journal article supplement (PMC9339296; doi:10.1093/g3journal/jkac112), 2022-05-12

### LS

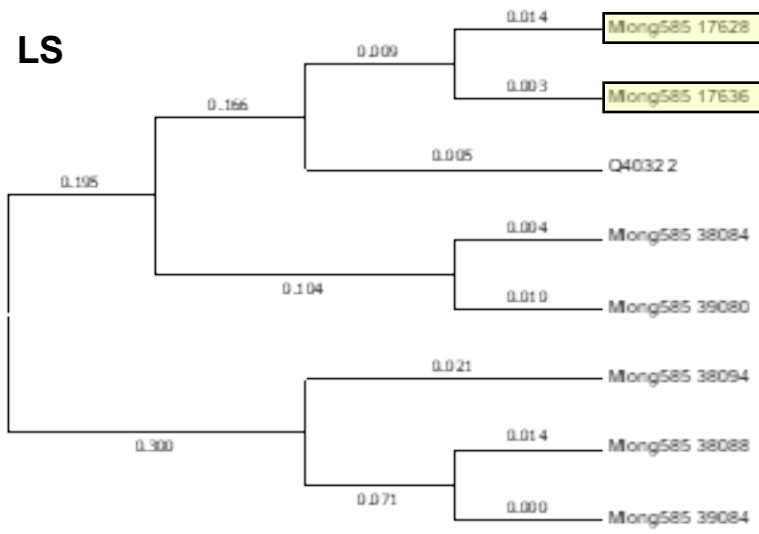

### L3-H

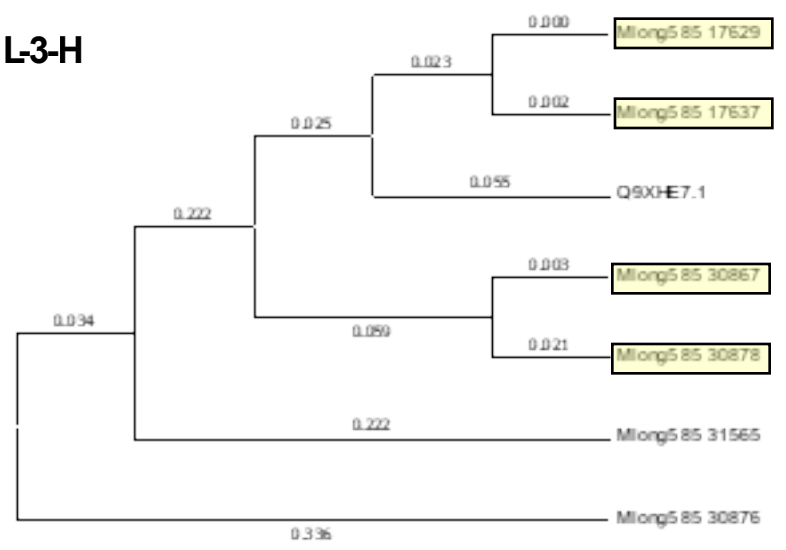

### MFS

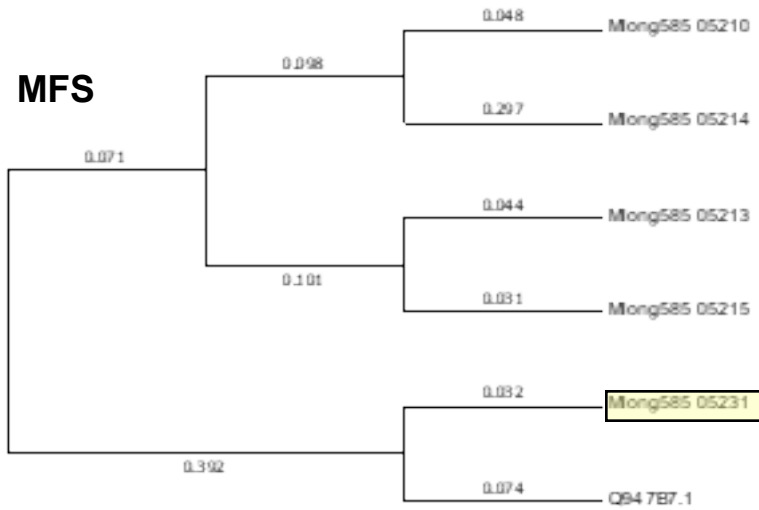

### ISPD

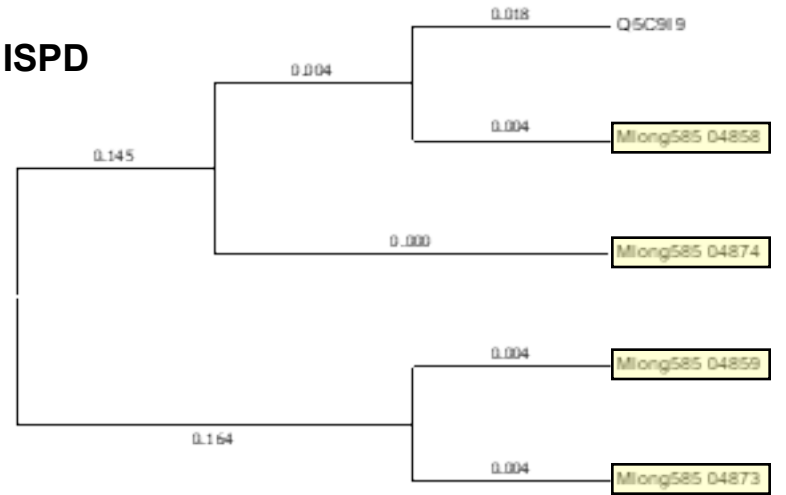

### ISPR

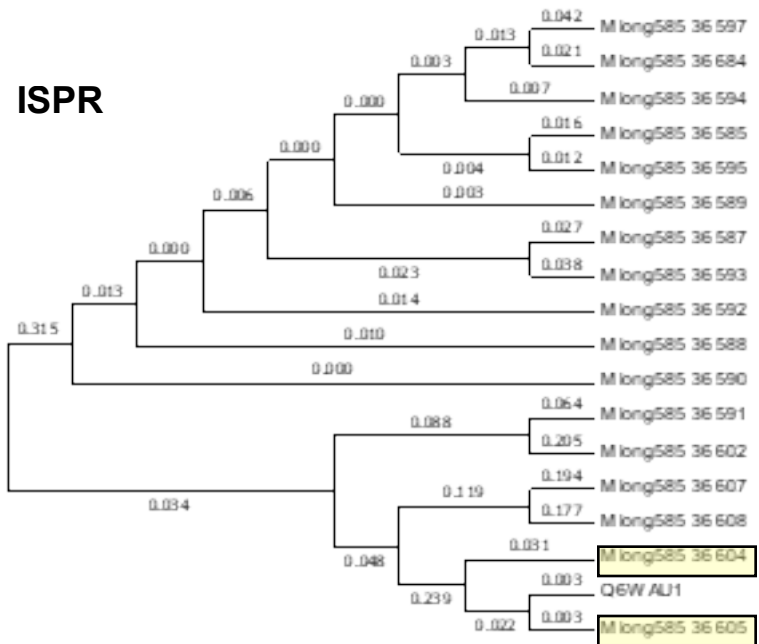

### PR

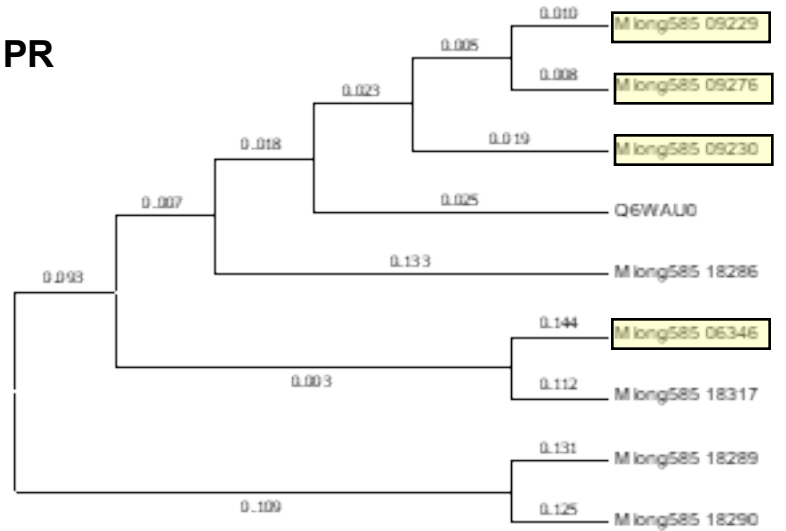

### MMR

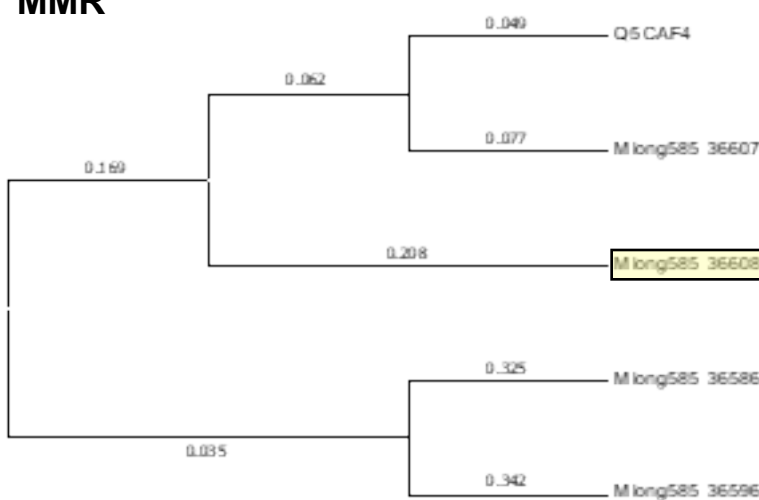

### MNR

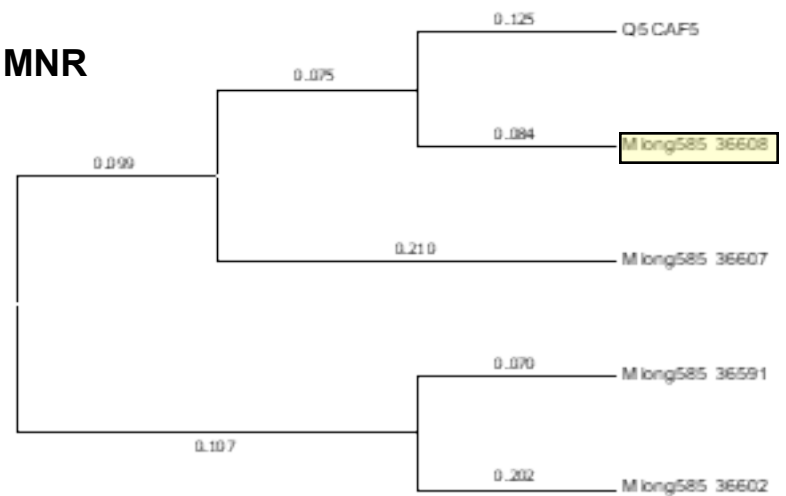

Supplement: jkac112_figure_s5.pdf [file jkac112_figure_s5.pdf]
