# Supplementary material for: Chromosome-level genome assembly of Mentha longifolia L. reveals gene organization underlying disease resistance and essential oil traits
Source: PubMed Central journal article supplement (PMC9339296; doi:10.1093/g3journal/jkac112), 2022-05-12

### ISPD-L1 Isopiperitenol Dehydrogenase

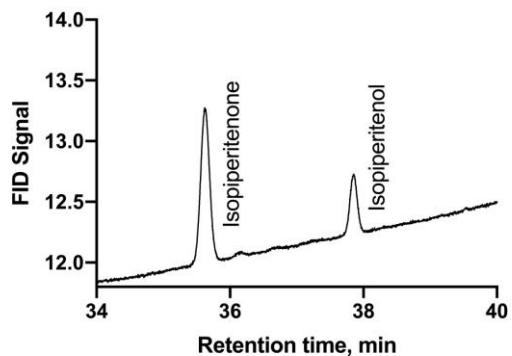

### ISPR-1 Isopiperitenone Reductase

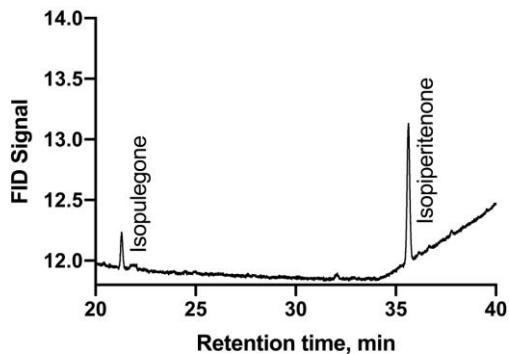

### PuR-1 Pulegone Reductase

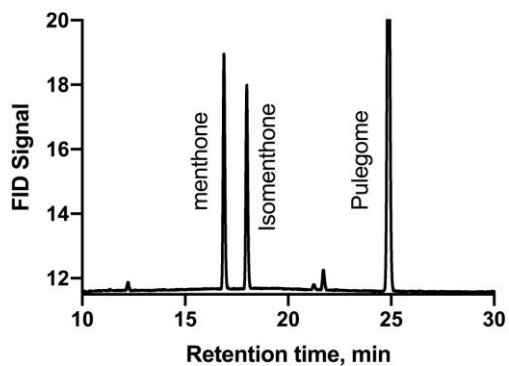

### PuR-2 Pulegone Reductase

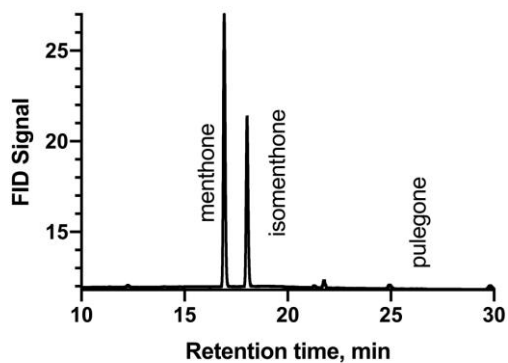

### PuR-L1 Pulegone Reductase-Like (inactive with (+)-pulegone)

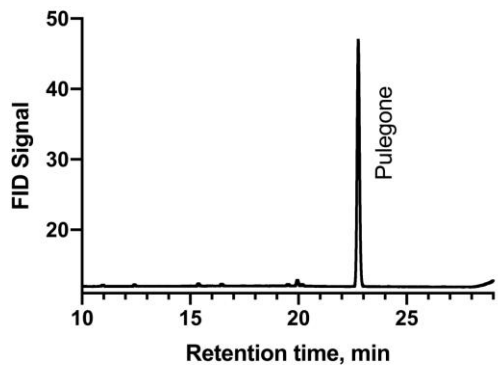

Supplement: jkac112_figure_s6.pdf [file jkac112_figure_s6.pdf]
